# Supplementary material for: Gold nanoparticle-composite nanofibers for enzymatic electrochemical sensing of hydrogen peroxide
Source: Royal Society of Chemistry journal article supplement (doi:10.1039/c3an00317e), 2013-01-01
Supplement: c3an00317e.pdf [file c3an00317e.pdf]

## SUPPORTING INFORMATION

### **Gold nanoparticle-composite nanofibers for enzymatic electrochemical sensing of hydrogen peroxide**

Anitha Devadoss<sup>a, †</sup> Hyungkyu Han<sup>a, †</sup> Taeseup Song<sup>a</sup> Young-Pil Kim<sup>\*b,c</sup> and Ungyu Paik<sup>\*a</sup>

<sup>a</sup>WCU Department of Energy Engineering, Hanyang University, Seoul 133-791, Republic of Korea

<sup>b</sup>Department of Life Science and <sup>c</sup>Research Institute for Natural Sciences, Hanyang University, Seoul 133-791, Republic of Korea

<sup>†</sup>These authors contributed equally to this work

\*To whom correspondence should be addressed

Phone: +82-2-2220-2560; +82-2-2220-0502

Fax: +82-2-2299-3495; +82-2-2281-0502

E-mail: [ypilkim@hanyang.ac.kr](mailto:ypilkim@hanyang.ac.kr) ; [upaik@hanyang.ac.kr](mailto:upaik@hanyang.ac.kr)

**Fig. S1**

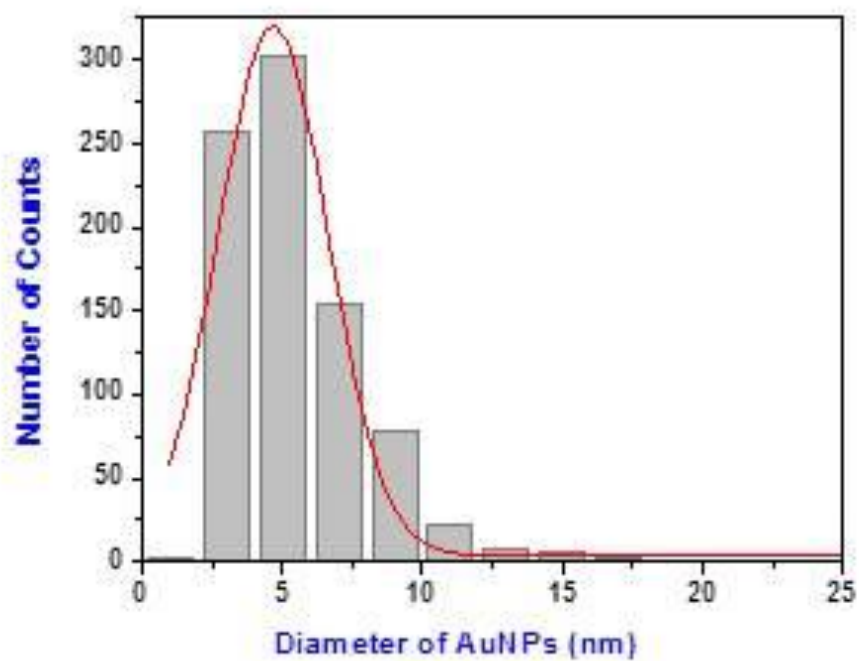

**Fig. S1:** Particle size distribution of DMAP-protected Au NPs in water.

**Fig. S2**

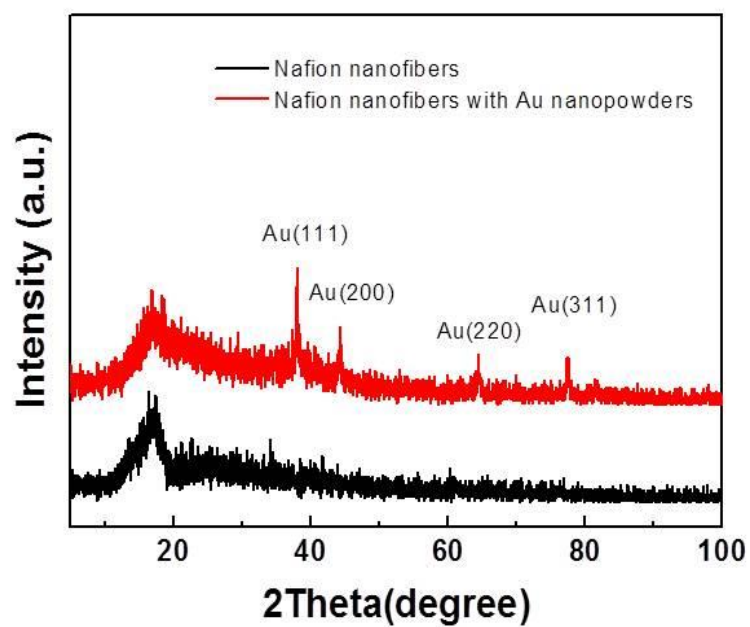

**Figure S2:** XRD patterns for Nafion NFs and Au NP-composite NFs.

**Fig. S3**

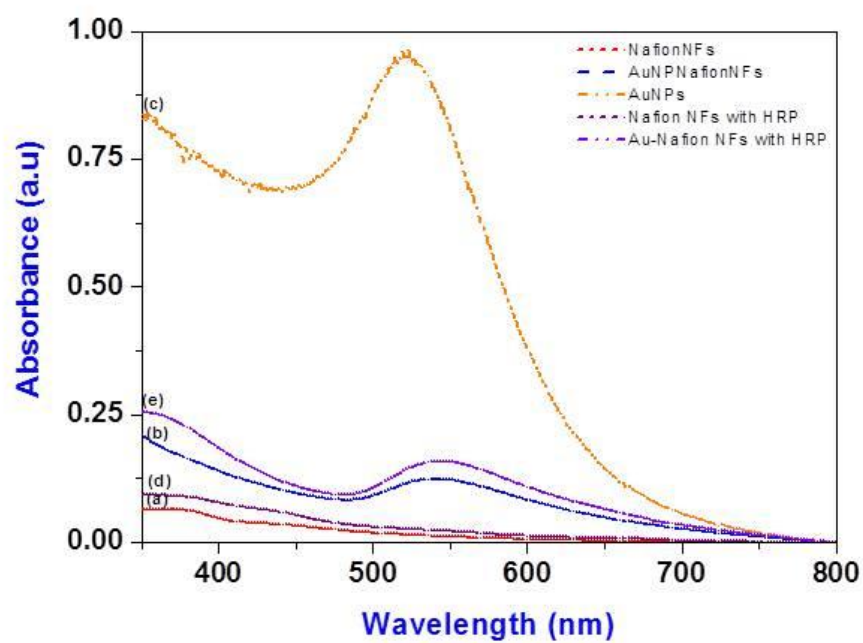

**Figure S3:** UV-Vis-NIR spectra for (a) Nafion NFs, (b) Au NP-composite NFs, (c) DMAP-protected Au NPs, (d) Nafion NFs-HRP and (e) Au NP-composite NFs-HRP.



**Fig. S4**

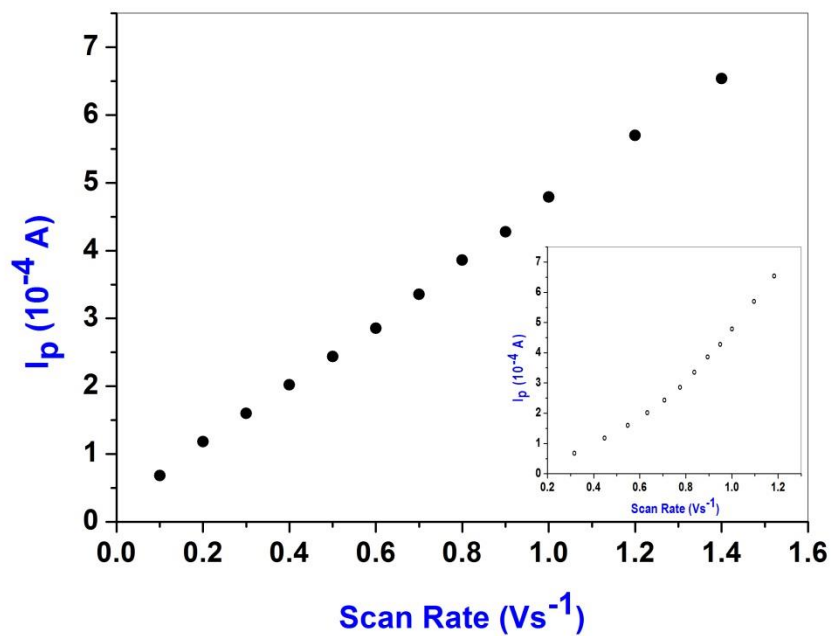

**Figure S4.** Linear dependency between the peak current and the scan rate on the Nafion NFs/HRP electrode. Inset shows the variation of the peak current with the square root of scan rate.

**Fig. S5**

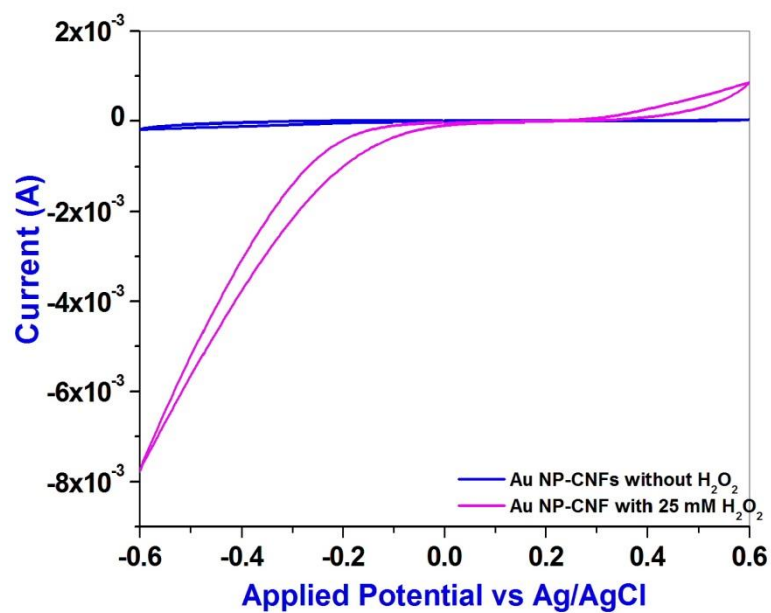

**Figure S5.** Voltammetric response of the Au NP-composite NFs (HRP-free electrodes) in the presence and absence of 25 mM  $\text{H}_2\text{O}_2$ .

**Fig. S6**

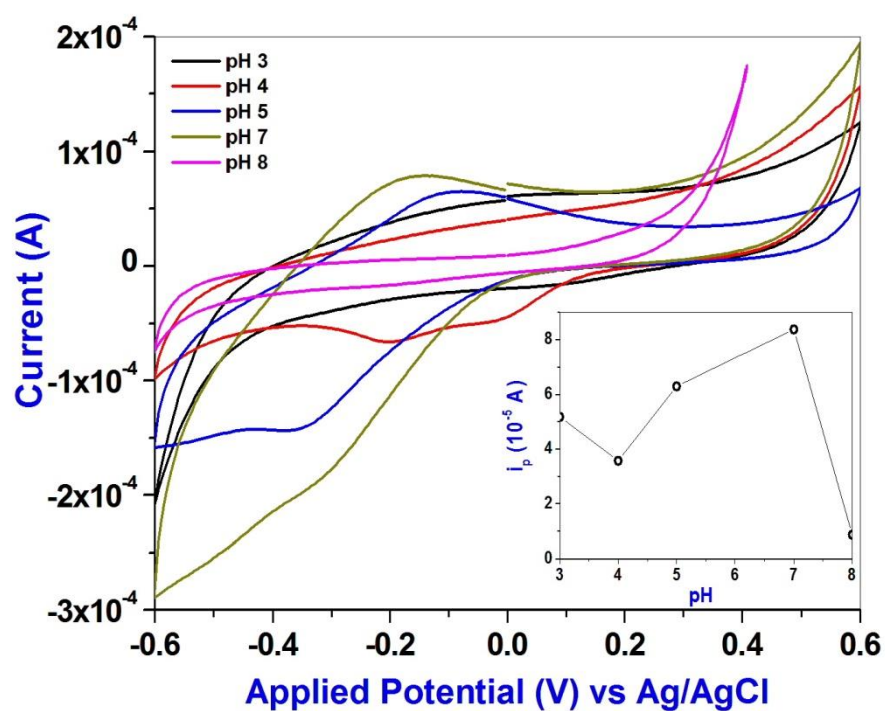

**Figure S6:** Dependence of pH on the peak currents obtained from cyclic voltammogram of HRP immobilized Au NP-composite nanofibers. The current response to 0.01 mM  $\text{H}_2\text{O}_2$  was performed at different pH levels (from pH 3 to pH 8).

**Fig. S7**

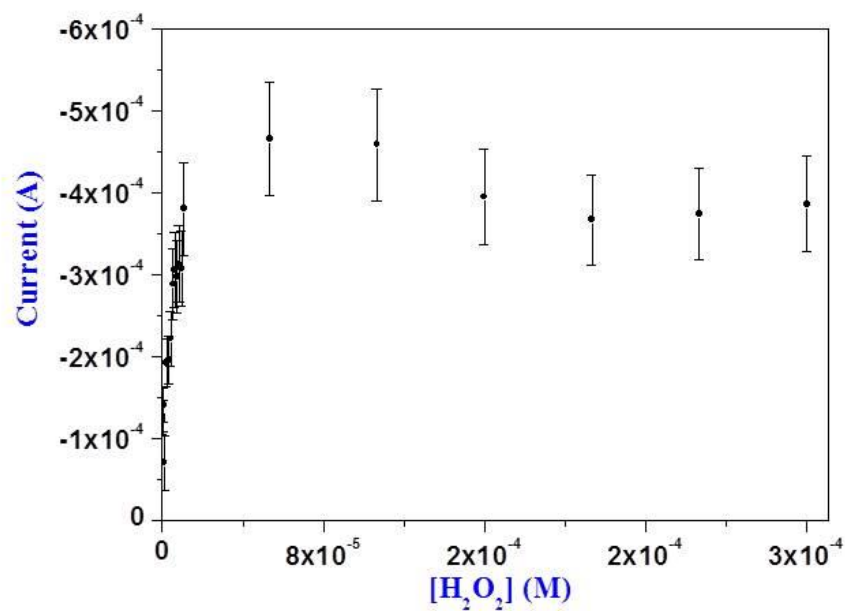

**Figure S7:** Response of steady state current with  $[\text{H}_2\text{O}_2]$  for the electrodes modified with Nafion NFs/HRP.

**Fig. S8**

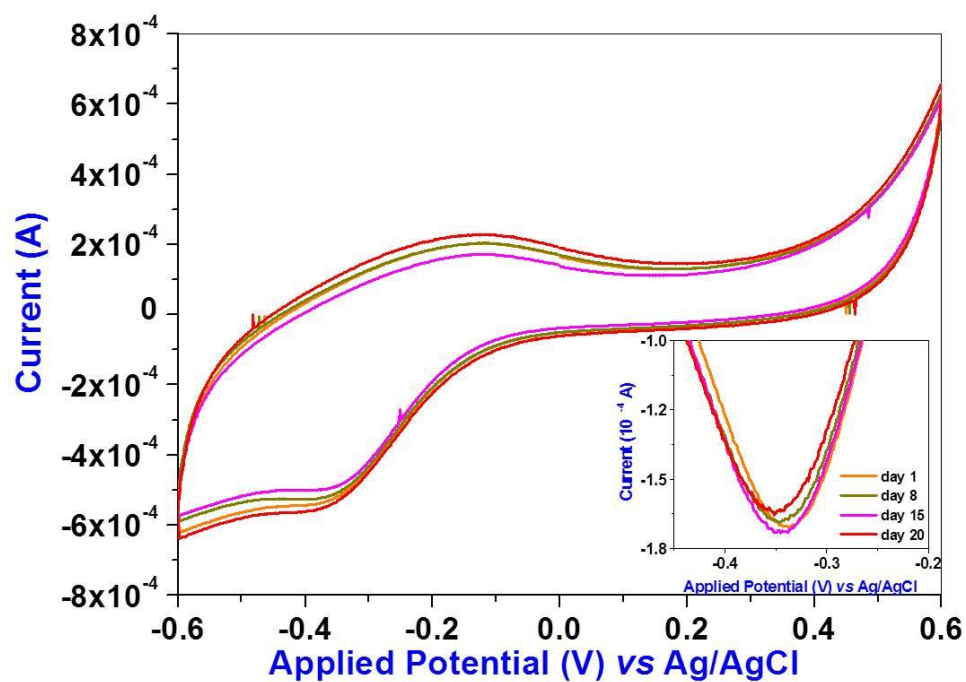

**Figure S8:** Stability of Au NP-composite NFs towards 0.05 mM H<sub>2</sub>O<sub>2</sub>. The electrodes were stored at 4° C over three weeks and used for the analysis at different time points.
